# Supplementary material for: Stroke-Associated Cortical Deafness: A Systematic Review of Clinical and Radiological Characteristics
Source: MDPI journal article supplement (doi:10.3390/brainsci11111383), 2021-10-22
Supplement: s1 [file s1]

Supplemental file: List of excluded articles

| Reference                                                                                                                                                                                                                           | Reason                                          |
|-------------------------------------------------------------------------------------------------------------------------------------------------------------------------------------------------------------------------------------|-------------------------------------------------|
| <b>Kinouchi T, Ishitani K, Uyama S, Miyamoto T, Fujimoto N, Ueta H. Basilar artery occlusion presenting as sudden bilateral deafness: a case report. J Med Case Rep. 2021 Mar 2;15(1):111.</b>                                      | Non-CD auditory central dysfunction             |
| <b>Slotwinski K, Ejma M, Szczepanska A, Budrewicz S, Koszewicz M. Pure word deafness in a patient with bilateral ischemic stroke in the superior temporal gyrus (STG). Neurocase. 2020 Jun;26(3):121-124.</b>                       | Non-CD auditory central dysfunction             |
| <b>Ben Younes T, Messelmani M, Mansour M, Zaouali J, Mrissa R. Pure word deafness revealing ischemic stroke in a Tunisian patient. Clin Neurol Neurosurg. 2019 Dec;187:105541.</b>                                                  | Non-CD auditory central dysfunction             |
| <b>Shibata Y. Delayed traumatic intracerebral hematoma presenting as cortical deafness: case report. Heliyon. 2020;6(2):e03443.</b>                                                                                                 | Non-stroke related auditory central dysfunction |
| <b>Kim JM, Woo SB, Lee Z, Heo SJ, Park D. Verbal auditory agnosia in a patient with traumatic brain injury: A case report. Medicine (Baltimore). 2018 Mar;97(11):e0136.</b>                                                         | Non-stroke related auditory central dysfunction |
| <b>Sugiura T, Torii T. Auditory agnosia caused by bilateral putamen haemorrhage. BMJ Case Rep. 2017 Dec 20;2017:bcr2017222535.</b>                                                                                                  | Non-CD auditory central dysfunction             |
| <b>Maffei C, Capasso R, Cazzolli G, Colosimo C, Dell'Acqua F, Piludu F, Catani M, Miceli G. Pure word deafness following left temporal damage: Behavioral and neuroanatomical evidence from a new case. Cortex. 2017;97:240–54.</b> | Non-CD auditory central dysfunction             |

|                                                                                                                                                                                                                                                                  |                                                                                                                                                                                                                                |
|------------------------------------------------------------------------------------------------------------------------------------------------------------------------------------------------------------------------------------------------------------------|--------------------------------------------------------------------------------------------------------------------------------------------------------------------------------------------------------------------------------|
| <b>Poliva O, Bestelmeyer PEG, Hall M, Bultitude JH, Koller K, Rafal RD. Functional mapping of the human auditory cortex: FMRI investigation of a patient with auditory agnosia from trauma to the inferior colliculus. Cogn Behav Neurol. 2015;28(3):160–80.</b> | Non-stroke related auditory central dysfunction                                                                                                                                                                                |
| <b>Gutschalk, A., Uppenkamp, S., Riedel, B., Bartsch, A., Brandt, T., &amp; Vogt-schaden, M. (2015). ScienceDirect Pure word deafness with auditory object agnosia after bilateral lesion of the superior temporal sulcus. Cortex. 73, 24–35</b>                 | Non-CD auditory central dysfunction                                                                                                                                                                                            |
| <b>Joswig H, Schönenberger U, Brügge D, Richter H, Surbeck W. Reversible pure word deafness due to inferior colliculi compression by a pineal germinoma in a young adult. Clin Neurol Neurosurg. 2015;139:62–5.</b>                                              | Non-stroke related auditory central dysfunction                                                                                                                                                                                |
| <b>Cavinato M, Rigon J, Volpato C, Semenza C, Piccione F. Preservation of Auditory P300-Like Potentials in Cortical Deafness. PLoS One. 2012;7(1):1-6.</b>                                                                                                       | Data presented by Semenza et al, 2012 – Semenza C, Cavinato M, Rigon J, Battel I, Meneghello F, Venneri A. Persistent cortical deafness: A voxel-based morphometry and tractography study. Neuropsychology. 2012;26(6):675–83. |
| <b>Chiang CI, Chou CH, Hsueh CJ, Cheng CA, Peng GS. Acute bilateral hearing loss as a "worsening sign" in a patient with critical basilar artery stenosis. J Clin Neurosci. 2013 Jan;20(1):177-9.</b>                                                            | Non-CD auditory central dysfunction                                                                                                                                                                                            |

|                                                                                                                                                                                                                                                                                  |                                     |
|----------------------------------------------------------------------------------------------------------------------------------------------------------------------------------------------------------------------------------------------------------------------------------|-------------------------------------|
| <b>Saygin AP, Leech R, Dick F. Nonverbal auditory agnosia with lesion to Wernicke's area. <i>Neuropsychologia</i>. 2010;48(1):107–13.</b>                                                                                                                                        | Non-CD auditory central dysfunction |
| <b>Mun SK, Hong YH, Kang SH, Hwang SN. A case of temporal intracerebral hemorrhage that presented with sudden bilateral hearing loss as the initial symptom. <i>J Korean Neurosurg Soc</i>. 2010 Nov;48(5):438-40.</b>                                                           | Non-CD auditory central dysfunction |
| <b>Gerace C, Pianura C. Sudden deafness without vertigo as a sole manifestation of AICA infarct. <i>Neurol Sci</i>. 2008 Oct;29(5):371-2.</b>                                                                                                                                    | Non-CD auditory central dysfunction |
| <b>Bovo R, Ortore R, Ciorba A, Berto A, Martini A. Bilateral sudden profound hearing loss and vertigo as a unique manifestation of bilateral symmetric inferior pontine infarctions. <i>Ann Otol Rhinol Laryngol</i>. 2007 Jun;116(6):407-10.</b>                                | Non-CD auditory central dysfunction |
| <b>Sugiura T, Torii T. Auditory agnosia caused by bilateral putamen haemorrhage. <i>BMJ Case Rep</i>. 2017;2017:bcr2017222535.</b>                                                                                                                                               | Non-CD auditory central dysfunction |
| <b>Tabuchi S, Kadowaki M, Watanabe T. Reversible cortical auditory dysfunction caused by cerebral vasospasm after ruptured aneurysmal subarachnoid hemorrhage and evaluated by perfusion magnetic resonance imaging. Case report. <i>J Neurosurg</i>. 2007 Jul;107(1):161-4.</b> | Non-CD auditory central dysfunction |
| <b>Satoh M, Takeda K, Kuzuhara S. A case of auditory agnosia with impairment of perception and expression of music: Cognitive processing of tonality. <i>Eur Neurol</i>. 2007;58(2):70–7.</b>                                                                                    | Non-CD auditory central dysfunction |
| <b>Plasencia PM, Dorado JI, Serrano Rodríguez JM, Sellán C. Neuropsychological evidence for "word-meaning deafness" in a Spanish-speaking patient. <i>Brain Lang</i>. 2006 May;97(2):214-8.</b>                                                                                  | Non-CD auditory central dysfunction |

|                                                                                                                                                                                                                                                                                                |                                                 |
|------------------------------------------------------------------------------------------------------------------------------------------------------------------------------------------------------------------------------------------------------------------------------------------------|-------------------------------------------------|
| Yi HA, Lee SR, Lee H, Ahn BH, Park BR, Whitman GT. Sudden deafness as a sign of stroke with normal diffusion-weighted brain MRI. <i>Acta Otolaryngol.</i> 2005 Oct;125(10):1119-21.                                                                                                            | Non-CD auditory central dysfunction             |
| Kimiskidis VK, Lalaki P, Papagiannopoulos S, Tsitouridis I, Tolika T, Serasli E, Kazis D, Tsara V, Tsalighopoulos MG, Kazis A. Sensorineural hearing loss and word deafness caused by a mesencephalic lesion: Clinicoelectrophysiologic correlations. <i>Otol Neurotol.</i> 2004;25(2):178–82. | Non-CD auditory central dysfunction             |
| Fernández CA, Carceller MA, García JR, García CG, Alegría JB. Sudden deafness as a manifestation of the rupture of a cerebral arteriovenous malformation. <i>Otolaryngol Head Neck Surg.</i> 2003 Apr;128(4):592-4.                                                                            | Non-CD auditory central dysfunction             |
| Vitte E, Tankéré F, Bernat I, Zouaoui A, Lamas G, Soudant J. Midbrain deafness with normal brainstem auditory evoked potentials. <i>Neurology.</i> 2002;58(6):970–3.                                                                                                                           | Non-stroke related auditory central dysfunction |
| Sato M, Yasui N, Isobe I, Kobayashi T. [A case of pure word deafness and auditory agnosia associated with bilateral temporo-parietal lesions]. <i>No To Shinkei.</i> 1982 Oct;34(10):939-45. Japanese.                                                                                         | Non-English language                            |
| Akkuzu B, Fişiloğlu AG, Özlüoğlu L, Can U. Sudden cortical hearing loss for speech: a case report. <i>Ear Hear.</i> 2001 Feb;22(1):14-7.                                                                                                                                                       | Non-CD auditory central dysfunction             |
| Mendez MF. Generalized auditory agnosia with spared music recognition in a left-hander. Analysis of a case with a right temporal stroke. <i>Cortex.</i> 2001;37(1):139–50.                                                                                                                     | Non-CD auditory central dysfunction             |
| Yaguchi H, Yaguchi M, Nishiwaki C, Takahashi Y. [A case of brain stem infarction with bilateral hearing loss]. <i>No To Shinkei.</i> 2000 Mar;52(3):249-52. Japanese.                                                                                                                          | Non-English language                            |

|                                                                                                                                                                                                                               |                                                 |
|-------------------------------------------------------------------------------------------------------------------------------------------------------------------------------------------------------------------------------|-------------------------------------------------|
| <b>Nakayama T, Nobuoka H, Wada S, Matsukado Y. Cortical deafness following bilateral hypertensive putaminal hemorrhage. No To Shinkei. 1986;38:565–570.</b>                                                                   | Non-English language                            |
| <b>Clarke S, Bellmann A, Meuli RA, Assal G, Steck AJ. Auditory agnosia and auditory spatial deficits following left hemispheric lesions: evidence for distinct processing pathways. Neuropsychologia. 2000;38(6):797-807.</b> | Non-CD auditory central dysfunction             |
| <b>Wang E, Peach RK, Xu Y, Schneck M, Manry II C. Perception of dynamic acoustic patterns by an individual with unilateral verbal auditory agnosia. Brain Lang. 2000;73(3):442–55.</b>                                        | Non-CD auditory central dysfunction             |
| <b>Bhaskaran R, Prakash M, Kumar PN, Srikumar B. Crossed aphasia leading to pure word deafness. J Assoc Physicians India. 1998 Sep;46(9):824-6.</b>                                                                           | Non-CD auditory central dysfunction             |
| <b>Johkura K, Matsumoto S, Hasegawa O, Kuroiwa Y. Defective auditory recognition after small hemorrhage in the inferior colliculi. J Neurol Sci. 1998;161(1):91–6.</b>                                                        | Non-stroke related auditory central dysfunction |
| <b>Johannes S, Jöbges ME, Dengler R, Münte TF. Cortical auditory disorders: a case of non-verbal disturbances assessed with event-related brain potentials. Behav Neurol. 1998;11(1):55-73.</b>                               | Non-CD auditory central dysfunction             |
| <b>Deplanque D, Godefroy O, Guerouaou D, Laureau E, Desautly A. Sudden bilateral deafness: lateral inferior pontine infarction. J Neurol Neurosurg Psychiatry. 1998 Jun;64(6):817-8.</b>                                      | Non-CD auditory central dysfunction             |
| <b>Papathanasiou I, Macfarlane S, Heron C. A Case of Verbal Auditory Agnosia: Missing the Word...Missing the Sound.... Int J Lang Commun Disord. 1998;33(S1):214–7.</b>                                                       | Non-CD auditory central dysfunction             |
| <b>Hu C-J, Chan K-Y, Lin T-J, Hsiao S-H, Chang Y-M, Sung S-M. Traumatic brainstem deafness with normal brainstem auditory evoked potentials. Neurology. 1997 May 1;48(5):1448–51.</b>                                         | Non-stroke related auditory central dysfunction |

|                                                                                                                                                                                                                                     |                                     |
|-------------------------------------------------------------------------------------------------------------------------------------------------------------------------------------------------------------------------------------|-------------------------------------|
| <b>Habib M, Daquin G, Milandre L, Royere ML, Rey M, Lanteri A, Salamon G, Khalil R. Mutism and auditory agnosia due to bilateral insular damage-Role of the insula in human communication. Neuropsychologia. 1995;33(3):327–39.</b> | Non-CD auditory central dysfunction |
| <b>Di Giovanni M, D’Alessandro G, Baldini S, Cantalupi D, Bottacchi E. Clinical and neuroradiological findings in a case of pure word deafness. Ital J Neurol Sci. 1992;13(6):507–10.</b>                                           | Non-CD auditory central dysfunction |
| <b>Praamstra P, Hagoort P, Maassen B, Crul T. Word deafness and auditory cortical function. A case history and hypothesis. Brain. 1991 Jun 1;114 ( Pt 3(3):1197–225.</b>                                                            | Non-CD auditory central dysfunction |
| <b>Shindo M, Kaga K, Tanaka Y. Speech discrimination and lip reading in patients with word deafness or auditory agnosia. Brain Lang. 1991;40(2):153–61.</b>                                                                         | Non-CD auditory central dysfunction |
| <b>Wolberg SC, Temlett JA, Fritz VU. Pure word deafness. S Afr Med J. 1990 Dec 1;78(11):668-70.</b>                                                                                                                                 | Non-CD auditory central dysfunction |
| <b>Fujii T, Fukatsu R, Watabe S ichi, Ohnuma A, Teramura K, Kimura I, Saso S, Kogure, K. Auditory Sound Agnosia without Aphasia Following a Right Temporal Lobe Lesion. Cortex. 1990;26(2):263–8.</b>                               | Non-CD auditory central dysfunction |
| <b>Bales JD. Reversible sensorineural hearing loss in a stroke patient. Ear Hear. 1989 Apr;10(2):109-11.</b>                                                                                                                        | Non-CD auditory central dysfunction |
| <b>Yaqub BA, Gascon GG, Nosha M Al, Whitaker H. Pure word deafness (acquired verbal auditory agnosia) in an arabic speaking patient. Brain. 1988;111(2):457–66.</b>                                                                 | Non-CD auditory central dysfunction |
| <b>Roberts M, Sandercock P, Ghadiali E. Pure word deafness and unilateral right temporo-parietal lesions: a case report. J Neurol Neurosurg Psychiatry. 1987 Dec;50(12):1708-9.</b>                                                 | Non-CD auditory central dysfunction |

|                                                                                                                                                                                                                                                                     |                                     |
|---------------------------------------------------------------------------------------------------------------------------------------------------------------------------------------------------------------------------------------------------------------------|-------------------------------------|
| <b>Meissner R. Doppelseitige zentrale Hörstörung infolge bitemporalen Hirninfarktes [Double-sided central hearing-loss owing to bitemporal infarct of brain (author's transl)]. HNO. 1981 Aug;29(8):282-4. German.</b>                                              | Non-English language                |
| <b>Buchman AS, Garron DC, Trost-Cardamone JE, Wichter MD, Schwartz M. Word deafness: one hundred years later. J Neurol Neurosurg Psychiatry. 1986 May;49(5):489-99.</b>                                                                                             | Non-CD auditory central dysfunction |
| <b>Coslett HB, Brashear HR, Heilman KM. Pure word deafness after bilateral primary auditory cortex infarcts. Neurology. 1984 Mar;34(3):347-52.</b>                                                                                                                  | Non-CD auditory central dysfunction |
| <b>Pamphlett R, Morris J. Cortical hearing deficit. A deaf brain. Med J Aust. 1983;2(1):35-6.</b>                                                                                                                                                                   | Non-CD auditory central dysfunction |
| <b>Auerbach SH, Allard T, Naeser M, Alexander MP, Albert ML. Pure word deafness: Analysis of a case with bilateral lesions and a defect at the prephonemic level. Brain. 1982;105(2):271-300.</b>                                                                   | Non-CD auditory central dysfunction |
| <b>Khurana RK, O'Donnell PP, Suter CM, Inayatullah M. Bilateral deafness of vascular origin. Stroke. 1981 Jul-Aug;12(4):521-3.</b>                                                                                                                                  | Non-CD auditory central dysfunction |
| <b>Tsuruoka H, Arai H, Kuwaha S, Sohma H. [Cortical deafness due to left unilateral brain damage--a case report (author's transl)]. Rinsho Shinkeigaku. 1980 Sep;20(9):735-41. Japanese.</b>                                                                        | Non-English language                |
| <b>Barraquer-Bordas L, Peña-Casanova J, Pons-Irazábal L. Sordera central sin disturbios afásicos por lesión temporal bilateral [Central deafness without aphasic disorders due to bilateral temporal lesion]. Acta Neurol Latinoam. 1980;26(3):165-74. Spanish.</b> | Non-English language                |

|                                                                                                                                                                                                                                       |                                                            |
|---------------------------------------------------------------------------------------------------------------------------------------------------------------------------------------------------------------------------------------|------------------------------------------------------------|
| <b>Parving A, Salomon G, Elberling C, Larsen B, Lassen NA. Middle Components of the Auditory Evoked Response in Bilateral Temporal Lobe Lesions: Report on a Patient with Auditory Agnosia. Scand Audiol. 1980 Jan 12;9(3):161-7.</b> | Non-CD auditory central dysfunction                        |
| <b>Goldstein MN, Brown M, Hollander J. Auditory agnosia and cortical deafness: analysis of a case with three-year followup. Brain Lang. 1975 Jul;2(3):324-32.</b>                                                                     | Uncertainty about the etiology or extension of the lesions |
| <b>Jerger J, Lovering L, Wertz M. Auditory disorder following bilateral temporal lobe insult: report of a case. J Speech Hear Disord. 1972 Nov;37(4):523-35.</b>                                                                      | Uncertainty about the etiology of the lesions              |
| <b>Albert ML, Sparks R, Von Stockert T, Sax D. A case study of auditory agnosia: linguistic and non-linguistic processing. Cortex. 1972 Dec;8(4):427-43.</b>                                                                          | Non-CD auditory central dysfunction                        |
| <b>Jerger J, Weikers NJ, Sharbrough FW 3rd, Jerger S. Bilateral lesions of the temporal lobe. A case study. Acta Otolaryngol Suppl. 1969;258:1-51.</b>                                                                                | Uncertainty about the etiology of the lesions              |
| <b>Spreen O, Benton AL, Fincham RW. Auditory agnosia without aphasia. Arch Neurol. 1965 Jul;13:84-92.</b>                                                                                                                             | Non-CD auditory central dysfunction                        |
